# Supplementary material for: Repression of viral gene expression and replication by the unfolded protein response effector XBP1u
Source: eLife journal article supplement (doi:10.7554/elife.51804), 2020-02-17
Supplement: supp [file elife-51804-supp-v1.zip]

Archive with 15 entries (15 files):
- elife_poa_e51804_Figure_9_source_data_1.xlsx
- elife_poa_e51804_Figure_5_source_data_1.xlsx
- elife_poa_e51804_Figure_3_source_data_1.xlsx
- elife_poa_e51804_Figure_2_source_data_1.xlsx
- elife_poa_e51804_Transparent_Reporting_File.pdf
- elife_poa_e51804_Supplementary_file_1.xlsx
- elife_poa_e51804_Supplementary_file_2.xlsx
- elife_poa_e51804_Figure_8_source_data_1.xlsx
- elife_poa_e51804_Figure_4_source_data_1.xlsx
- elife_poa_e51804_Figure_3_figure_supplement_1.pdf
- elife_poa_e51804_Figure_7_source_data_1.xlsx
- elife_poa_e51804_Figure_2_figure_supplement_1.pdf
- elife_poa_e51804_Figure_6_source_data_1.xlsx
- elife_poa_e51804_Figure_1_source_data_1.xlsx
- elife_poa_e51804_Supplementary_file_3.xlsx
