# Supplementary material for: Repression of viral gene expression and replication by the unfolded protein response effector XBP1u
Source: eLife journal article supplement (doi:10.7554/elife.51804), 2020-02-17
Supplement: supp [file elife-51804-supp-v1.zip › elife_poa_e51804_Figure_1_source_data_1.xlsx]

## Sheet: Figure 1A
Figure 1 - Source Data 1	qPCR data points ΔΔCT
Figure 1A
hours post infection (hpi)	MCMV-GFP			UV-inactivated MCMV-GFP
0	1	1	1	1	1	1
1	0.900432	0.812316	0.85524	0.754513	0.867396	0.808988
2	0.723917	0.731359	0.727629	0.619199	0.6141	0.616644
3	0.649347	0.673211	0.661171	0.659414	0.875651	0.759879
4	0.916793	1.1236	1.01494	0.833949	0.986488	0.907018
5	2.56361	2.65063	2.60676	0.907255	1.08495	0.992131
6	9.70532	9.27618	9.48832	2.09466	2.09359	2.09413
7	5.94403	5.3293	5.62828	2.76515	2.70613	2.73548
8	2.1747	2.13514	2.15483	2.31521	2.75873	2.52726
24	1.0141	1.07599	1.04459	1.64391	1.78605	1.71351
Normalization was done using 0hpi

## Sheet: Figure 1C 
Figure 1C
hours post infection (hpi)	MCMV-GFP			MCMV-GFP + CHX			MCMV-GFP + PAA
0	1	1	1	1	1	1	1	1	1
1	0.653896	0.771426	0.710234	1.12374	1.13539	1.12955	1.08547	0.676749	0.857082
2	1.03727	1.34411	1.18077	0.515209	0.566008	0.540012	1.57255	1.08025	1.30336
3	1.33974	1.47537	1.40592	0.307827	0.400094	0.350941	1.63848	1.33069	1.47659
4	1.17761	1.67459	1.40428	0.178915	0.34873	0.249786	2.42901	2.37719	2.40296
5	3.13329	3.06686	3.0999	0.200203	0.148509	0.17243	3.73776	4.13496	3.93135
6	10.6049	10.4511	10.5277	0.207087	0.208734	0.207909	9.25435	9.75207	9.49995
7	2.06324	1.96666	2.01437	0.156175	0.157248	0.15671	4.89104	3.93252	4.38567
8	1.19145	1.0299	1.10773	0.162651	0.189406	0.175519	3.01475	2.76912	2.88932
24	0.522004	0.64564	0.58054	N/A	N/A	N/A	1.10205	1.02609	1.06339
Normalization was done using 0hpi
