# Supplementary material for: Repression of viral gene expression and replication by the unfolded protein response effector XBP1u
Source: eLife journal article supplement (doi:10.7554/elife.51804), 2020-02-17
Supplement: supp [file elife-51804-supp-v1.zip › elife_poa_e51804_Figure_2_figure_supplement_1.pdf]

**Figure 2—figure supplement 1**

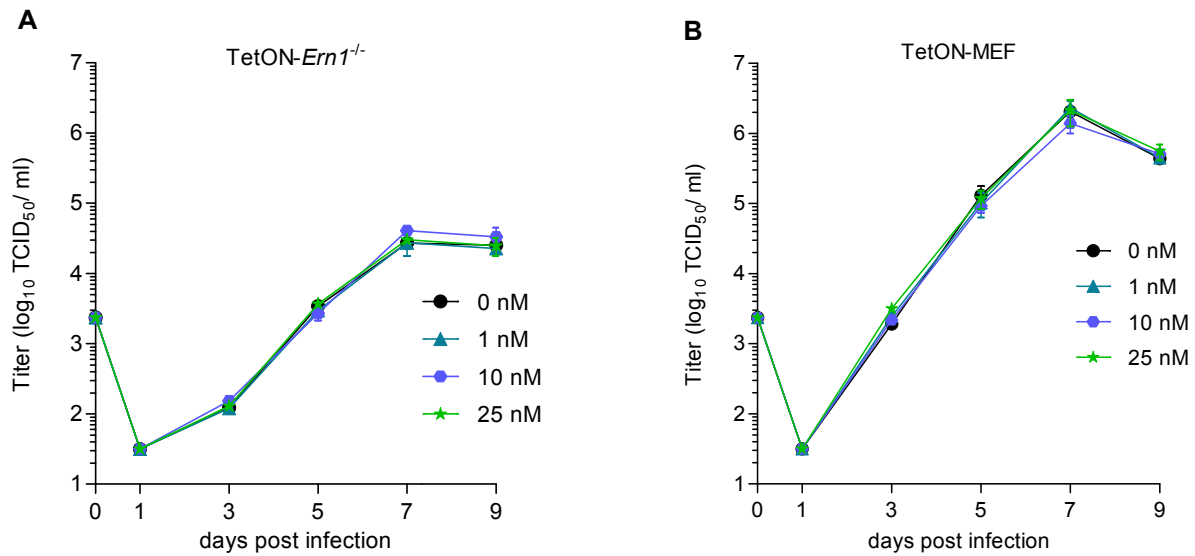

**Figure 2—figure supplement 1.**

**MCMV replication kinetics on TetON expressing cells**

- A. Multistep MCMV replication kinetics on TetON-*Ern1*<sup>-/-</sup> MEFs induced with different doxycycline concentrations. 24 h after induction, cells were infected with MCMV-GFP (MOI 0.1). Virus titers in the supernatants were determined by titration and are shown as means  $\pm$ SEM of 3 biological replicates.
- B. Multistep MCMV replication kinetics on WT MEFs transduced with a TetON-expressing lentiviral vector. 24 h after doxycycline treatment, cells were infected with MCMV-GFP (MOI 0.1). Virus titers in the supernatants were determined as above.

Data provided in Figure 2 – source data 1
