# Supplementary material for: Repression of viral gene expression and replication by the unfolded protein response effector XBP1u
Source: eLife journal article supplement (doi:10.7554/elife.51804), 2020-02-17
Supplement: supp [file elife-51804-supp-v1.zip › elife_poa_e51804_Figure_2_source_data_1.xlsx]

## Sheet: Figure 2B
Figure 2 - Source Data 1	GrowthCurve Data points
Figure 2B - MOI 0.1
	TCID50/ml
days post infection (dpi)	0 nM			0.1 nM			1 nM			5 nM			10 nM			15 nM			25 nM
0	825	464	825	825	464	825	825	464	825	825	464	825	825	464	825	825	464	825	825	464	825
1	46.4	68.1	46.4	38.3	68.1	56.2	46.4	68.1	38.3	38.3	56.2	100	46.4	68.1	38.3	56.2	56.2	68.1	38.3	38.3	46.4
3	178	464	383	215	464	562	261	464	383	464	681	464	215	681	383	178	261	261	215	261	464
5	5620	8250	8250	12100	8250	12100	17800	17800	14700	46400	100000	46400	121000	100000	68100	38300	38300	38300	10000	10000	12100
7	17800	17800	17800	56200	46400	38300	261000	383000	316000	1000000	1470000	1210000	3830000	3160000	2150000	178000	178000	121000	31600	21500	21500
9	16400	15900	16100	48300	42100	46400	411000	403000	466000	1410000	1550000	1490000	3640000	3960000	3840000	241000	243000	236000	36400	31600	21500

## Sheet: Figure 2C
GrowthCurve Data points
Figure 2C - MOI 3
	TCID50/ml
days post infection (dpi)	0 nM			0.1 nM			1 nM			5 nM			10 nM			25 nM
0	100000	100000	100000	100000	100000	100000	100000	100000	100000	100000	100000	100000	100000	100000	100000	100000	100000	100000
1	681	464	562	562	825	681	825	562	825	215	464	681	383	383	1000	464	562	562
3	5810	5810	5810	10000	10000	6810	14700	14700	26100	21500	14700	17800	21500	21500	14700	1780	3830	1780
5	1210	3830	3160	31600	26100	21500	178000	56200	121000	100000	121000	68100	31600	100000	82500	3160	3830	3160
7	681	562	1210	6810	5620	8250	68100	82500	178000	383000	316000	383000	215000	147000	316000	562	681	681
9	181	262	210	1210	1830	1160	42500	52500	41900	188100	192500	178000	118100	137500	125000	181	162	110

## Sheet: Figure 2D
ATP Assay of TetON-IRE1-GFPinducible cells with concentrations of 0, 10 and 25nM Doxycycline
Figure 2D
1st Experiment								2nd Experiment
d3	Backround (only Media)	50	66	60	30			d3	Backround (only Media)	69	69	71	54
	0 nM	16489	16682	14912	14105				0 nM	26545	26847	25055	26025
	10 nM	14899	14820	14781	14938				10 nM	24830	24430	25755	27106
	25 nM	11486	11540	11605	11568				25 nM	18687	18853	17708	17647
						Median								Median
minus Backround	0 nM	16439	16616	14852	14075	15495.5		minus Backround	0 nM	26495	26781	24995	25995	26066.5
	10 nM	14849	14754	14721	14908				10 nM	24780	24364	25695	27076
	25 nM	11436	11474	11545	11538				25 nM	18637	18787	17648	17617
Normalized to 100%	0 nM	106.089	107.231	95.8472	90.8328			Normalized to 100%	0 nM	101.644	102.741	95.8894	99.7257
	10 nM	95.8278	95.2147	95.0018	96.2086				10 nM	95.0645	93.4686	98.5748	103.873
	25 nM	73.8021	74.0473	74.5055	74.4603				25 nM	71.4979	72.0734	67.7038	67.5848
d5	Backround (only Media)	58	81	73	78			d5	Backround (only Media)	121	77	101	92
	0 nM	31919	30893	35629	30497				0 nM	56468	51562	50559	55881
	10 nM	30026	30832	33418	29907				10 nM	49028	48378	49719	50449
	25 nM	19254	21850	19144	20003				25 nM	35300	32366	35931	33218
						Median								Median
minus Backround	0 nM	31861	30812	35556	30419	32162		minus Backround	0 nM	56347	51485	50458	55789	53519.8
	10 nM	29968	30751	33345	29829				10 nM	48907	48301	49618	50357
	25 nM	19196	21769	19071	19925				25 nM	35179	32289	35830	33126
Normalized to 100%	0 nM	99.0641	95.8025	110.553	94.5806			Normalized to 100%	0 nM	105.283	96.1981	94.2792	104.24
	10 nM	93.1783	95.6128	103.678	92.7461				10 nM	91.3812	90.2489	92.7097	94.0905
	25 nM	59.6853	67.6855	59.2967	61.952				25 nM	65.7309	60.331	66.9472	61.8949

## Sheet: Figure 2 - figure supplement 1
	GrowthCurve TetON-MEF cells stimulated with concentration of 0, 1, 10 and 25 nM doxycycline													GrowthCurve TetON-Ern1-/- stimulated with concentration of 0, 1, 10 and 25 nM doxycycline
		lowest dilution						read	Dilution factor	TCID50/ml					lowest dilution						read	Dilution factor	TCID50/ml
		with all wells positive						TCID50 titer	10						with all wells positive						TCID50 titer	10
		Input (d0)	1	12	10	2	0	316.228	3162.28	3162.28					Input (d0)	1	12	10	2	0	316.228	3162.28	3162.28
			1	12	9	1	0	215.443	2154.43	2154.43						1	12	9	1	0	215.443	2154.43	2154.43
			1	12	8	1	0	177.828	1778.28	1778.28						1	12	8	1	0	177.828	1778.28	1778.28
	d1	TetON-MEF 0 nM	1	0	0			3.16228	31.6228	31.6228				d1	TetON-Ern1-/-	1	0	0			3.16228	31.6228	31.6228
			1	0	0			3.16228	31.6228	31.6228					0 nM	1	0	0			3.16228	31.6228	31.6228
			1	0	0			3.16228	31.6228	31.6228						1	0	0			3.16228	31.6228	31.6228
		TetON-MEF 1 nM	1	0	0			3.16228	31.6228	31.6228					TetON-Ern1-/-	1	0	0			3.16228	31.6228	31.6228
			1	0	0			3.16228	31.6228	31.6228					1 nM	1	0	0			3.16228	31.6228	31.6228
			1	0	0			3.16228	31.6228	31.6228						1	0	0			3.16228	31.6228	31.6228
		TetON-MEF 10 nM	1	0	0			3.16228	31.6228	31.6228					TetON-Ern1-/-	1	0	0			3.16228	31.6228	31.6228
			1	0	0			3.16228	31.6228	31.6228					10 nM	1	0	0			3.16228	31.6228	31.6228
			1	0	0			3.16228	31.6228	31.6228						1	0	0			3.16228	31.6228	31.6228
		TetON-MEF 25 nM	1	1	0			3.83119	38.3119	38.3119					TetON-Ern1-/-	1	1	0			3.83119	38.3119	38.3119
			1	0	0			3.16228	31.6228	31.6228					25 nM	1	0	0			3.16228	31.6228	31.6228
			1	0	0			3.16228	31.6228	31.6228						1	0	0			3.16228	31.6228	31.6228
	d3	TetON-MEF 0 nM	1	12	9	1		215.443	2154.43	2154.43				d3	TetON-Ern1-/-	1	7	1			14.678	146.78	146.78
			1	12	8	1		177.828	1778.28	1778.28					0 nM	1	6	1			12.1153	121.153	121.153
			1	12	7	2		177.828	1778.28	1778.28						1	6	0			10	100	100
		TetON-MEF 1 nM	1	12	10	1		261.016	2610.16	2610.16					TetON-Ern1-/-	1	6	1			12.1153	121.153	121.153
			1	12	8	2		215.443	2154.43	2154.43					1 nM	1	6	1			12.1153	121.153	121.153
			1	12	9	2		261.016	2610.16	2610.16						1	6	1			12.1153	121.153	121.153
		TetON-MEF 10 nM	1	12	10	1		261.016	2610.16	2610.16					TetON-Ern1-/-	1	7	1			14.678	146.78	146.78
			1	12	8	1		177.828	1778.28	1778.28					10 nM	1	9	1			21.5443	215.443	215.443
			1	12	9	1		215.443	2154.43	2154.43						1	6	0			10	100	100
		TetON-MEF 25 nM	1	12	10	2		316.228	3162.28	3162.28					TetON-Ern1-/-	1	7	1			14.678	146.78	146.78
			1	12	10	2		316.228	3162.28	3162.28					25 nM	1	7	0			12.1153	121.153	121.153
			1	12	11	1		316.228	3162.28	3162.28						1	7	0			12.1153	121.153	121.153
	d5	TetON-MEF 0 nM	3	12	7	0		12115.3	121153	121153				d5	TetON-Ern1-/-	1	12	11	2		383.119	3831.19	3831.19
			3	12	9	1		21544.3	215443	215443					0 nM	1	12	10	1		261.016	2610.16	2610.16
			3	12	3	0		5623.41	56234.1	56234.1						1	12	11	2		383.119	3831.19	3831.19
		TetON-MEF 1 nM	3	12	8	1		17782.8	177828	177828					TetON-Ern1-/-	1	12	10	2		316.228	3162.28	3162.28
			3	12	2	0		4641.59	46415.9	46415.9					1 nM	1	12	11	1		316.228	3162.28	3162.28
			3	12	5	0		8254.04	82540.4	82540.4						1	12	10	1		261.016	2610.16	2610.16
		TetON-MEF 10 nM	3	12	3	0		5623.41	56234.1	56234.1					TetON-Ern1-/-	1	12	10	0		215.443	2154.43	2154.43
			3	12	6	0		10000	100000	100000					10 nM	1	12	9	1		215.443	2154.43	2154.43
			3	12	5	2		12115.3	121153	121153						1	12	11	2		383.119	3831.19	3831.19
		TetON-MEF 25 nM	3	12	7	2		17782.8	177828	177828					TetON-Ern1-/-	1	12	11	2		383.119	3831.19	3831.19
			3	12	6	1		12115.3	121153	121153					25 nM	1	12	10	1		261.016	2610.16	2610.16
			3	12	3	0		5623.41	56234.1	56234.1						1	12	11	3		464.159	4641.59	4641.59
	d7	TetON-MEF 0 nM	4	12	8	1		177828	1.77828e+06	1.77828e+06				d7	TetON-Ern1-/-	2	12	11	1		3162.28	31622.8	31622.8
			4	12	9	0		177828	1.77828e+06	1.77828e+06					0 nM	2	12	11	1		3162.28	31622.8	31622.8
			4	12	10	1		261016	2.61016e+06	2.61016e+06						2	12	8	1		1778.28	17782.8	17782.8
		TetON-MEF 1 nM	4	12	10	1		261016	2.61016e+06	2.61016e+06					TetON-Ern1-/-	2	12	7	2		1778.28	17782.8	17782.8
			4	12	11	1		316228	3.16228e+06	3.16228e+06					1 nM	2	12	7	2		1778.28	17782.8	17782.8
			4	12	7	0		121153	1.21153e+06	1.21153e+06						2	12	11	3		4641.59	46415.9	46415.9
		TetON-MEF 10 nM	4	12	8	2		215443	2.15443e+06	2.15443e+06					TetON-Ern1-/-	2	12	11	3		4641.59	46415.9	46415.9
			4	12	6	1		121153	1.21153e+06	1.21153e+06					10 nM	2	12	11	2		3831.19	38311.9	38311.9
			4	12	5	0		82540.4	825404	825404						2	12	10	3		3831.19	38311.9	38311.9
		TetON-MEF 25 nM	4	12	11	2		383119	3.83119e+06	3.83119e+06					TetON-Ern1-/-	2	12	11	2		3831.19	38311.9	38311.9
			4	12	5	0		82540.4	825404	825404					25 nM	2	12	9	2		2610.16	26101.6	26101.6
			4	12	8	1		177828	1.77828e+06	1.77828e+06						2	12	8	3		2610.16	26101.6	26101.6
	d9	TetON-MEF 0 nM	4	12	2	0		46415.9	464159	464159				d9	TetON-Ern1-/-	2	12	7	2		1778.28	17782.8	17782.8
			4	12	1	0		38311.9	383119	383119					0 nM	2	12	10	1		2610.16	26101.6	26101.6
			4	12	2	0		46415.9	464159	464159						2	12	12	0		3162.28	31622.8	31622.8
		TetON-MEF 1 nM	4	12	3	0		56234.1	562341	562341					TetON-Ern1-/-	2	12	9	1		2154.43	21544.3	21544.3
			4	12	2	0		46415.9	464159	464159					1 nM	2	12	7	1		1467.8	14678	14678
			4	12	0	0		31622.8	316228	316228						2	12	10	2		3162.28	31622.8	31622.8
		TetON-MEF 10 nM	4	12	1	0		38311.9	383119	383119					TetON-Ern1-/-	2	12	8	1		1778.28	17782.8	17782.8
			4	12	4	0		68129.2	681292	681292					10 nM	2	12	9	2		2610.16	26101.6	26101.6
			4	12	2	0		46415.9	464159	464159						2	12	11	4		5623.41	56234.1	56234.1
		TetON-MEF 25 nM	4	12	5	0		82540.4	825404	825404					TetON-Ern1-/-	2	12	7	1		1467.8	14678	14678
			4	12	1	0		38311.9	383119	383119					25 nM	2	12	8	2		2154.43	21544.3	21544.3
			4	12	2	0		46415.9	464159	464159						2	12	11	2		3831.19	38311.9	38311.9
