# Supplementary material for: Repression of viral gene expression and replication by the unfolded protein response effector XBP1u
Source: eLife journal article supplement (doi:10.7554/elife.51804), 2020-02-17
Supplement: supp [file elife-51804-supp-v1.zip › elife_poa_e51804_Figure_3_figure_supplement_1.pdf]

**Figure 3—figure supplement 1**

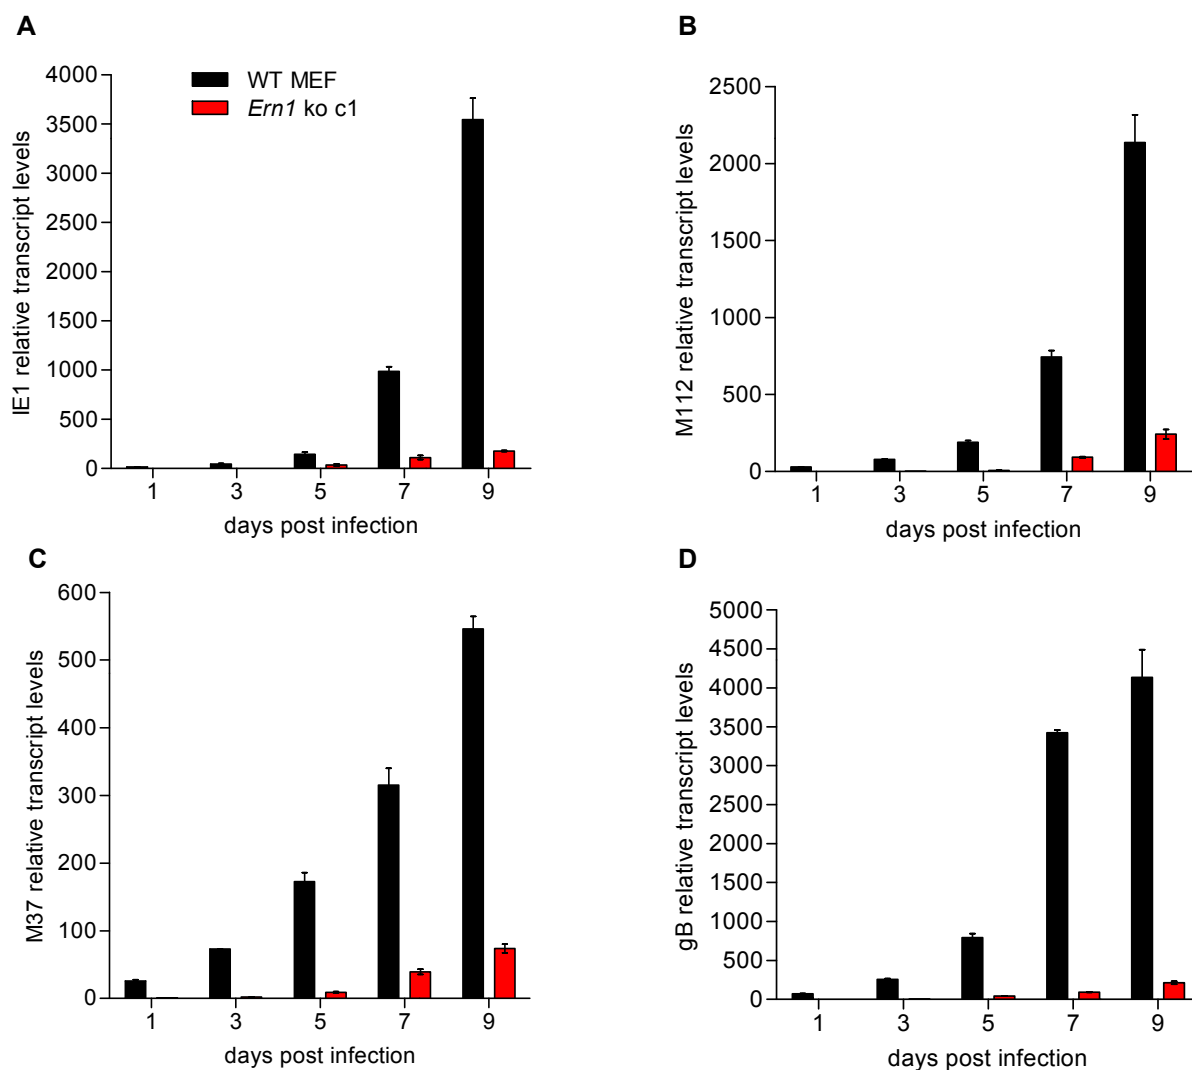

**Figure 3—figure supplement 1.**

**qRT-PCR analysis of viral transcripts in WT and IRE1-deficient cells**

A-D. WT and *Ern1* ko MEFs were infected with MCMV-GFP (MOI 0.1). Cells were harvested at the indicated times, total RNA was extracted, and IE1 (M123), E1 (M112), M37, and gB (M55) transcripts were quantified by qRT-PCR. Transcript levels were normalized to *Ern1* ko cells at day 1 post infection (means  $\pm$ SEM of 3 biological replicates).

Data provided in Figure 3—source data 1.
