# Supplementary material for: Repression of viral gene expression and replication by the unfolded protein response effector XBP1u
Source: eLife journal article supplement (doi:10.7554/elife.51804), 2020-02-17
Supplement: supp [file elife-51804-supp-v1.zip › elife_poa_e51804_Figure_3_source_data_1.xlsx]

## Sheet: Figure 3B
Figure 3 - Source Data 1	GrowthCurve Data points
Figure 3B - MOI 0.1
	TCID50/ml
days post infection (dpi)	WT MEF			Ern1 ko c1			Ern1 ko c2			Xbp1 ko c1			Xbp1 ko c2
0	825	562	464	825	562	464	825	562	464	825	562	464	825	562	464
1	31.6	31.6	31.6	31.6	31.6	31.6	31.6	38.3	31.6	31.6	31.6	38.3	38.3	31.6	31.6
3	825	562	464	464	215	383	261	383	261	464	464	562	825	562	1210
5	383000	215000	316000	4640	5620	8250	10000	6810	12100	261000	178000	464000	261000	383000	464000
7	14700000	46400000	14700000	56200	82500	100000	121000	68100	68100	4640000	5620000	5620000	5620000	8250000	5620000
9	6810000	10000000	8250000	21500	26100	21500	46400	56200	68100	5620000	5620000	8250000	2610000	6810000	3160000

## Sheet: Figure 3C
	GrowthCurve Data points
Figure 3C - MOI 0.1
	TCID50/ml
days post infection (dpi)	WT MEF			Traf2 ko c1			Traf2 ko c2
0	1470	681	1210	1470	681	1210	1470	681	1210
1	31.6	31.6	31.6	31.6	46.4	31.6	31.6	31.6	31.6
3	1470	1780	1210	2610	2610	1780	3830	3830	4640
5	178000	261000	178000	215000	261000	562000	178000	215000	147000
7	4640000	5620000	4640000	4640000	2610000	3830000	2610000	2610000	3160000
9	681000	825000	1000000	1210000	1470000	1210000	562000	681000	562000

## Sheet: Figure 3 - figure supplement 3
Raw data Ct-Values for IE1 (M123)
Ct GAPDH	Ct IE1	TC	DC(t) IE1 = C(t)target-C(t)reference	n-times Expression = 2^-DDC(t)	TC	Normalized
15.435	23.514	1	8.07894	0.00369824	1	13.9304
15.5967	21.8151	3	6.21846	0.0134294	3	50.5852
15.8851	20.5381	5	4.65307	0.0397455	5	149.711
16.3483	18.3849	7	2.03664	0.243731	7	918.075
16.844	16.7647	9	-0.079306	1.05651	9	3979.61
15.4446	23.2931	1	7.84851	0.00433874	1	13.8939
15.5735	21.8836	3	6.3101	0.0126029	3	40.3582
15.9494	20.9852	5	5.03586	0.0304829	5	97.615
16.4819	18.2152	7	1.73329	0.300765	7	963.137
16.9412	16.8803	9	-0.060976	1.04317	9	3340.53
15.4753	23.2483	1	7.773	0.00457186	1	17.8262
15.567	21.8231	3	6.25612	0.0130834	3	51.0136
15.9423	20.3708	5	4.42851	0.0464395	5	181.072
16.3607	18.2135	7	1.85276	0.276862	7	1079.51
16.7524	16.986	9	0.233583	0.85052	9	3316.27
15.53	27.4091	1 IKO	11.8791	0.000265481	1 IKO	1
15.5191	26.0626	3 IKO	10.5435	0.000670035	3 IKO	2.52386
15.5377	21.6299	5 IKO	6.09219	0.0146578	5 IKO	55.2123
14.9679	19.9675	7 IKO	4.99962	0.0312581	7 IKO	117.742
15.2977	19.7057	9 IKO	4.40801	0.0471038	9 IKO	177.428
15.4424	27.0873	1 IKO	11.6449	0.000312277	1 IKO	1
15.4919	26.1304	3 IKO	10.6385	0.000627338	3 IKO	2.00892
14.9821	22.1777	5 IKO	7.1956	0.00682197	5 IKO	21.8459
15.0355	20.4919	7 IKO	5.45641	0.022775	7 IKO	72.932
15.4777	19.5658	9 IKO	4.08807	0.058799	9 IKO	188.291
15.5298	27.4588	1 IKO	11.9289	0.000256469	1 IKO	1
15.5099	26.089	3 IKO	10.5791	0.000653715	3 IKO	2.5489
14.9398	21.8766	5 IKO	6.93676	0.0081626	5 IKO	31.8268
15.1198	19.8738	7 IKO	4.75403	0.0370592	7 IKO	144.498
15.3035	19.8549	9 IKO	4.55138	0.042648	9 IKO	166.289
Raw data Ct-Values M112 (E1)
Ct GAPDH	Ct E1	TC	DC(t) E1 = C(t)target-C(t)reference	n-times Expression = 2^-DDC(t)	TC	Normalized
15.4584	20.8779	1	5.41944	0.023366	1	88.0141
15.5973	19.5318	3	3.93458	0.0653994	3	246.344
15.9907	18.5229	5	2.53228	0.172865	5	651.14
16.4941	17.3257	7	0.831652	0.561885	7	2116.48
16.9723	16.3434	9	-0.628933	1.54642	9	5824.99
15.4134	20.7194	1	5.30604	0.0252769	1	95.2118
15.7404	19.6715	3	3.93108	0.0655583	3	246.942
16.0032	18.804	5	2.80084	0.143503	5	540.541
16.7351	17.2883	7	0.553194	0.68151	7	2567.08
17.0953	16.0444	9	-1.0509	2.07182	9	7804.03
15.3969	20.6706	1	5.27377	0.0258487	1	97.3657
15.5945	19.4724	3	3.87781	0.0680241	3	256.23
16.0714	18.6709	5	2.5995	0.164995	5	621.496
16.4035	17.0608	7	0.657318	0.634056	7	2388.33
16.9059	16.0785	9	-0.827467	1.77457	9	6684.36
15.6015	25.8168	1 IKO	10.2153	0.000841163	1 IKO	3.16845
15.6606	24.5113	3 IKO	8.85069	0.00216608	3 IKO	8.15911
15.1058	22.8239	5 IKO	7.71808	0.00474926	5 IKO	17.8893
15.0587	18.6206	7 IKO	3.56191	0.0846757	7 IKO	318.953
15.4019	17.9315	9 IKO	2.52959	0.173188	9 IKO	652.356
15.5897	26.0441	1 IKO	10.4544	0.000712697	1 IKO	2.28226
15.6462	25.0312	3 IKO	9.38503	0.00149564	3 IKO	4.78945
15.175	22.4186	5 IKO	7.24355	0.00659893	5 IKO	21.1317
15.1783	19.1647	7 IKO	3.98642	0.0630911	7 IKO	202.036
15.6409	17.8411	9 IKO	2.20021	0.217607	9 IKO	696.839
15.6777	25.9661	1 IKO	10.2884	0.000799597	1 IKO	3.11771
15.7172	24.6044	3 IKO	8.88714	0.00211204	3 IKO	8.23508
15.0586	22.9206	5 IKO	7.86202	0.0042983	5 IKO	16.7595
14.9685	18.7985	7 IKO	3.83006	0.070313	7 IKO	274.158
15.4112	17.95	9 IKO	2.53878	0.172089	9 IKO	670.992
Raw data Ct-Values gB (M55)
Ct GAPDH	Ct gB	TC	DC(t) gB = C(t)target-C(t)reference	n-times Expression = 2^-DDC(t)	TC	Normalized
16.0273	20.8031	1	4.77585	0.0365028	1	137.497
16.1748	19.0228	3	2.84802	0.138887	3	523.152
16.3908	17.9162	5	1.5254	0.347384	5	1308.51
17.0103	16.2218	7	-0.788531	1.72731	7	6506.37
17.606	16.4094	9	-1.19658	2.29196	9	8633.27
16.0496	20.8408	1	4.79113	0.0361183	1	115.661
16.0752	19.1355	3	3.06024	0.119888	3	383.916
16.6804	17.9984	5	1.31799	0.401094	5	1284.42
17.0784	16.3874	7	-0.691022	1.61443	7	5169.86
17.7047	16.6179	9	-1.08678	2.124	9	6801.65
15.9498	20.9224	1	4.97259	0.0318494	1	124.184
16.1664	19.1888	3	3.02235	0.123078	3	479.894
16.6978	17.8901	5	1.19239	0.437578	5	1706.16
17.0936	16.2603	7	-0.833381	1.78186	7	6947.64
17.5201	16.708	9	-0.812048	1.7557	9	6845.67
15.9713	26.9289	1 IKO	10.9576	0.000502861	1 IKO	1.89415
15.9983	24.5645	3 IKO	8.56617	0.00263831	3 IKO	9.93787
15.4769	20.8872	5 IKO	5.41027	0.023515	5 IKO	88.5753
15.2826	19.6591	7 IKO	4.37652	0.0481434	7 IKO	181.344
15.7501	18.7833	9 IKO	3.03318	0.122158	9 IKO	460.138
16.0159	27.0389	1 IKO	11.023	0.000480562	1 IKO	1.5389
16.1605	24.699	3 IKO	8.53857	0.00268927	3 IKO	8.6118
15.5694	21.2374	5 IKO	5.66793	0.019669	5 IKO	62.9858
15.6126	20.0182	7 IKO	4.4056	0.0471828	7 IKO	151.093
16.1617	19.4086	9 IKO	3.24689	0.105339	9 IKO	337.326
16.0153	26.9455	1 IKO	10.9302	0.000512491	1 IKO	1.99826
16.043	24.5827	3 IKO	8.53965	0.00268725	3 IKO	10.4779
15.3807	20.9731	5 IKO	5.59237	0.0207267	5 IKO	80.8156
15.1393	19.646	7 IKO	4.50666	0.0439906	7 IKO	171.524
15.5065	18.9464	9 IKO	3.43998	0.092143	9 IKO	359.275
Raw data Ct-Values M37
Ct GAPDH	Ct M37	TC	DC(t) M37 = C(t)target-C(t)reference	n-times Expression = 2^-DDC(t)	TC	Normalized
15.4281	20.1496	1	4.72151	0.0379039	1	142.775
15.698	18.9924	3	3.29444	0.101924	3	383.922
16.0077	17.86	5	1.85222	0.276966	5	1043.26
16.5213	17.5784	7	1.05717	0.480575	7	1810.21
17.0611	17.5201	9	0.45908	0.72745	9	2740.13
15.531	20.5719	1	5.04089	0.0303768	1	97.2751
15.927	19.2251	3	3.29807	0.101668	3	325.57
16.1648	18.4057	5	2.24095	0.211547	5	677.435
16.8261	18.2811	7	1.45497	0.364763	7	1168.07
17.2755	17.5992	9	0.323662	0.799039	9	2558.75
15.5098	20.1089	1	4.5991	0.0412604	1	160.879
15.7433	18.9993	3	3.25597	0.104678	3	408.15
15.9233	17.9645	5	2.04123	0.242957	5	947.313
16.6281	17.653	7	1.02489	0.491447	7	1916.2
16.9775	17.3304	9	0.352942	0.782986	9	3052.94
15.7145	25.1948	1 IKO	9.48035	0.00140001	1 IKO	5.2735
15.8089	24.0984	3 IKO	8.28949	0.00319606	3 IKO	12.0388
15.242	21.3816	5 IKO	6.13957	0.0141842	5 IKO	53.4284
15.1276	19.1572	7 IKO	4.02956	0.0612325	7 IKO	230.648
15.3721	18.5253	9 IKO	3.15322	0.112405	9 IKO	423.403
15.7573	25.2659	1 IKO	9.50862	0.00137284	1 IKO	4.39623
15.9077	24.527	3 IKO	8.61927	0.00254297	3 IKO	8.14331
15.2805	21.9322	5 IKO	6.65172	0.00994565	5 IKO	31.8488
15.2711	19.8095	7 IKO	4.53848	0.0430311	7 IKO	137.798
15.7108	18.8926	9 IKO	3.18176	0.110203	9 IKO	352.902
15.7278	25.1478	1 IKO	9.41994	0.00145987	1 IKO	5.69219
15.7743	24.0634	3 IKO	8.28905	0.00319704	3 IKO	12.4656
15.1654	21.2462	5 IKO	6.0808	0.0147739	5 IKO	57.6051
15.0633	19.0651	7 IKO	4.00179	0.0624225	7 IKO	243.392
15.4549	18.9411	9 IKO	3.48618	0.0892392	9 IKO	347.953
