# Supplementary material for: Repression of viral gene expression and replication by the unfolded protein response effector XBP1u
Source: eLife journal article supplement (doi:10.7554/elife.51804), 2020-02-17
Supplement: supp [file elife-51804-supp-v1.zip › elife_poa_e51804_Figure_4_source_data_1.xlsx]

## Sheet: Fig. 4B
Figure 4 - Source Data 1	GrowthCurve Data points
Figure 4B - MOI 0.1
	TCID50/ml
days post infection (dpi)	WT MEF			Ire1 ko c1 + WT IRE1			Ire1 ko c1			Ire1 ko c1 + IRE1-K907A
0	1000	825	1210	1000	825	1210	1000	825	1210	1000	825	1210
1	31.6	31.6	31.6	31.6	31.6	31.6	31.6	31.6	31.6	31.6	31.6	31.6
3	464	562	825	562	681	1000	464	316	383	316	261	316
5	20000	14700	26100	14700	14700	20100	1780	1470	1780	1780	1264	1470
7	121000	147000	147000	178000	147000	147000	6250	6110	6810	4640	5620	5810
9	100000	100000	121000	100000	100000	147000	4640	5620	4640	4640	5620	5620
