# Supplementary material for: Repression of viral gene expression and replication by the unfolded protein response effector XBP1u
Source: eLife journal article supplement (doi:10.7554/elife.51804), 2020-02-17
Supplement: supp [file elife-51804-supp-v1.zip › elife_poa_e51804_Figure_5_source_data_1.xlsx]

## Sheet: Figure 5B
Figure 5 - Source Data 1
Figure 5B - MOI 0.1
	TCID50/ml
days post infection (dpi)	Xbp1-/-			Xbp1/Ern1 dko c1			Xbp1/Ern1 c2
0	1000	825	1210	1000	825	1210	1000	825	1210
1	31.6	31.6	31.6	31.6	31.6	31.6	31.6	31.6	31.6
3	825	1000	1470	1470	1470	1210	3830	4640	4640
5	46400	121000	46400	26100	21500	21500	68100	82500	82500
7	178000	178000	178000	261000	178000	383000	178000	261000	261000
9	82500	56200	56200	147000	121000	121000	100000	68100	68100

## Sheet: Figure 5D
Figure 5D - MOI 0.1
	TCID50/ml
days post infection (dpi)	Xbp1-/- + empty vector			Xbp1-/- + XBP1 WT			Xbp1-/- + XBP1 stop			Xbp1-/- + XBP1 unspl.
0	464	383	464	464	383	464	464	383	464	464	383	464
1	31.6	31.6	31.6	31.6	31.6	31.6	31.6	31.6	31.6	31.6	31.6	31.6
3	168.1	182.5	182.5	168.1	168.1	182.5	138.3	156.2	138.3	138.3	146.4	146.4
5	31600	31600	26100	17800	14700	17800	3830	4640	4640	4640	3830	4640
7	178000	562000	681000	261000	316000	464000	8250	10000	8250	12100	8250	8250
9	121000	147000	383000	147000	178000	121000	6810	8250	8250	5620	5620	8250
