# Supplementary material for: Repression of viral gene expression and replication by the unfolded protein response effector XBP1u
Source: eLife journal article supplement (doi:10.7554/elife.51804), 2020-02-17
Supplement: supp [file elife-51804-supp-v1.zip › elife_poa_e51804_Figure_6_source_data_1.xlsx]

## Sheet: Figure 6B
Figure 6 - Source Data 1	GrowthCurve Data points
Figure 6B - MOI 0.1
	TCID50/ml
days post infection (dpi)	Atf6+/+			Atf6-/-
0	383	383	383	383	383	383
1	31.6	31.6	31.6	31.6	31.6	31.6
3	82.5	121	100	121	147	56.2
5	3830	3830	3830	12100	6810	4640
7	178000	100000	178000	147000	464000	383000
9	562000	681000	215000	681000	1210000	316000

## Sheet: Figure 6D
Figure 6D MOI 0.1	GrowthCurve Data points
	TCID50/ml
days post infection (dpi)	Atf6+/+			Atf6/Xbp1 dko c2
0	464	464	562	464	464	562
1	31.6	31.6	31.6	31.6	31.6	31.6
3	562	825	681	100	82.5	56.2
5	6810	21500	12100	383	825	825
7	38300	82500	68100	2610	2610	2610
9	121000	100000	147000	3160	5620	8250
11	68100	100000	82500	3160	8250	3830
