# Supplementary material for: Repression of viral gene expression and replication by the unfolded protein response effector XBP1u
Source: eLife journal article supplement (doi:10.7554/elife.51804), 2020-02-17
Supplement: supp [file elife-51804-supp-v1.zip › elife_poa_e51804_Figure_7_source_data_1.xlsx]

## Sheet: Fig. 7A-F
Figure 7 - Source Data 1	Data Points for the performed luciferase assays
Figure 7A
	relative luciferase activity (%)
	WT MEF				Ern1 ko c1				Xbp1 ko c1
MIEP	86.2892	100.455	102.964	110.27	41.2035	40.6132	39.4033	41.1222	88.9041	84.0077	87.8332	94.6726
all-mut	27.6576	28.7293	27.9545	30.2837	23.2201	27.8789	24.4707	33.9888	21.7999	22.1679	22.5928	20.5054
Figure 7B
	relative luciferase activity (%)
	Xbp1 -/-						Xbp1/Ern1 dko c1
MIEP	98	99.9	102	93.2	100.4	105.7	105.8	93.2	99.5	84.4	84.5	105.6
all-mut	33.4	38.2	39	37.8	38.8	45.6	27.3	34.6	26.2	37.7	35.3	48.8
Figure 7C
	relative luciferase activity (%)
	Atf6 -/-						Atf6/Xbp1 dko c2
MIEP	105.5	95.1	99.4	101.7	98.3	99.7	55.5	49.4	49.8	54.2	51.1	49.1
all-mut	48.1	38.4	35.1	26	32	37.5	33	24.1	21.6	24.4	24.4	19.7
Figure 7D
	relative luciferase activity (%)
MIEP	Xbp1 -/-
EV	93.9	91.7	117.8	97.2
XBP1s	101.7	107.2	127.3	133.2
XBP1u	52.4	53.2	58.5	58.3
XBP1s(1,5µg) + XBP1u(0,5µg)	131.8	113.3	127.6	138.4
XBP1s(1,5µg) + XBP1u(1,0µg)	114	118.9	128.8	107.1
XBP1s(1,5µg) + XBP1u(1,5µg)	76.6	78.5	79	76.3
Figure 7E
	relative luciferase activity (%)
MIEP	Atf6 -/-
EV	100.4	101.9	97.8
XBP1s	115.5	107.5	117.3
XBP1u	55.9	56.2	51.4
ATF6(N)	129.5	125.6	114.4
ATF6(N)(1,5µg) + XBP1u(0,5µg)	95.4	98.2	92.8
ATF6(N)(1,5µg) + XBP1u(1,0µg)	73.3	77.3	72.8
ATF6(N)(1,5µg) + XBP1u(1,5µg)	41.5	40.5	43.3
Figure 7F
	relative luciferase activity (%)
MIEP	Atf6/Xbp1 dko c2
EV	106.9	82.4	108.5
XBP1s	298.2	357.1	277.7
XBP1u	117.8	102.5	107
ATF6(N)	288.8	310.5	292
ATF6(N)(1,5µg) + XBP1u(0,5µg)	260.8	265	258.6
ATF6(N)(1,5µg) + XBP1u(1,0µg)	134.4	125.3	109.9
ATF6(N)(1,5µg) + XBP1u(1,5µg)	81.5	83	71.1
Normalization was done using the MIEP or MIEP with empty vector
