# Supplementary material for: Repression of viral gene expression and replication by the unfolded protein response effector XBP1u
Source: eLife journal article supplement (doi:10.7554/elife.51804), 2020-02-17
Supplement: supp [file elife-51804-supp-v1.zip › elife_poa_e51804_Figure_8_source_data_1.xlsx]

## Sheet: Fig. 8B
Figure 8 - Source Data 1		Data Points for the DPI-ELISA
Figure 8B
	relative extinction
Motif	empty vector	XBP1s	XBP1u	XBP1sΔDBD	XBP1uΔDBD	ATF6(N)
1	1.03	1.45	1.25	0.96	0.75	0.79
	1.01	1.45	1.32	0.86	0.81	0.86
	0.96	1.44	1.25	0.85	0.79	0.86
2	1	1.09	1.16	0.92	1.03	1.47
	1.07	1.14	1.07	0.92	1.01	1.5
	0.94	1.07	1.13	0.92	1	1.41
3	1.04	2.62	2.39	1.13	0.94	1.09
	0.99	2.55	2.32	1.02	0.94	1.08
	0.97	2.65	2.44	1.05	0.96	0.99
4	1.13	2.24	2.06	1.21	1.11	1.63
	0.92	2.01	2.14	1.14	1.03	1.63
	0.96	2.01	2.04	1.18	1.15	1.61
5	1.2	1.21	1.17	0.85	0.78	0.94
	0.93	1.18	1.17	0.94	0.79	1.16
	0.88	1.23	1.24	0.84	0.79	0.97
ERdj4	0.96	2.68	2.27	0.89	0.94	1.05
	0.99	2.39	2.33	0.91	0.87	1.19
	1.05	2.36	2.16	0.91	0.86	1.02
LTori lyt	1.05	1	0.96	0.91	0.93	0.92
	0.99	1.02	1.16	0.88	0.86	0.92
	0.96	0.94	0.93	0.86	0.89	0.91
Normalization was done using the empty vector for each motif
