# Supplementary material for: Repression of viral gene expression and replication by the unfolded protein response effector XBP1u
Source: eLife journal article supplement (doi:10.7554/elife.51804), 2020-02-17
Supplement: supp [file elife-51804-supp-v1.zip › elife_poa_e51804_Figure_9_source_data_1.xlsx]

## Sheet: Fig. 9A-C
Figure 9 - Source Data 1		Data points of luciferase assays and GrowthCurve
Figure 9A						Figure 9B						Figure 9C - MOI 0.1
													TCID50/ml
	relative luciferase activity (%)						relative luciferase activity (%)					days post infection (dpi)	MCMV-GFP			MCMV-GFP-4-mut
	empty vector	XBP1s	XBP1u	ATF6(N)			empty vector	XBP1s	XBP1u	ATF6(N)		0	562	825	562	464	562	681
MIEP	85.1	173.1	110.6	156.1		MIEP	101.7	166.1	92.3	177.9		1	31.6	31.6	31.6	31.6	31.6	31.6
	117.1	161	111	172.7			98.3	151.1	83.5	147.7		3	562	681	562	215	562	316
	98	174.1	101.5	181.4			100.8	161.2	85.4	158.2		5	17800	4640	12100	383	825	681
	111.4	154.8	115.9	178.3		4-mut	52.3	70.5	59.2	69.6		7	17800	17800	14700	825	562	681
	103.9	150.4	101.4	170.8			60.3	66.6	64.7	72.8
	84.1	167.3	106.2	171.7			55.8	68.2	61.2	68.5
1-mut	88.3	158.5	96.1	157		4-only	66.7	146.2	48.2	135.8
	91.2	162.4	110.3	160.6			65.2	163.7	62.4	142.8
	73.2	148.6	91.1	147			64.9	160.2	50.3	137.5
	102.8	161.2	108.5	178		all-mut	31.3	44.3	47	40.2
	105	144.6	104.1	151.2			40.9	41.8	50.5	45.1
	98.4	160	90.4	159.3			33.2	42.3	48.1	42.9
2-mut	94.9	133.3	97.1	107.7
	95.4	144	95.9	104.7
	90.4	136.1	108.4	105.1		Normalization was done using MIEP with empty vector
	103.5	142.3	112.3	154.1
	101.5	172.2	105	144
	101.1	159.8	99.3	165.1
3-mut	69.9	123.5	80.3	134
	63.9	122.9	75.6	137.1
	82.3	130.7	89	139.5
	85.6	134.3	89.5	126.8
	85.9	143.7	94.2	126.8
	92.9	122.1	85.7	119.1
4-mut	53.7	60.2	71.3	76.8
	65.9	60.6	69.7	65.9
	68.7	72.5	63.1	82.5
	36.7	63.9	57	43.4
	39.7	70.5	59.3	48
	36.3	67.3	58.8	54.5
5-mut	89.2	154.2	89.9	150.4
	89.3	151.2	99	141.7
	100.6	159.9	98.2	165.6
	106.5	169.8	93.6	171.1
	89.5	183.3	88.2	167.5
	101.6	176.1	102.1	186.1
all-mut	48.7	59.3	53.9	67.7
	50.6	65.6	65.9	72.5
	60.6	69.2	61.6	61.7
	51.7	48.8	48.8	49.1
	40.9	45.3	45	33.4
	36.3	55.6	47.5	35.2
	Normalization was done using MIEP with empty vector
