# Supplementary material for: Repression of viral gene expression and replication by the unfolded protein response effector XBP1u
Source: eLife journal article supplement (doi:10.7554/elife.51804), 2020-02-17
Supplement: supp [file elife-51804-supp-v1.zip › elife_poa_e51804_Supplementary_file_1.xlsx]

## Sheet: Sheet1
Supplementary file 1
Name	Sequence
MIEP	CCATTATTGGCACGTACATAAGGTCAATAGGGGTGAGTCATTGGGTTTTTCCAGCCAATTTAATTAAAACGCCATGTACTTTCCCACCATTGACGTCAATGGGCTATTGAAACTAATGCAACGTGACCTTTAAACGGTACTTTCCCATAGCTGATTAATGGGAAAGTACCGTTCTCGAGCCAATACACGTCAATGGGAAGTGAAAGGGCAGCCAAAACGTAACACCGCCCCGGTTTTCCCCTGGAAATTCCATATTGGCACGCATTCTATTGGCTGAGCTGCGTTCTACGTGGGTATAAGAGGCGCGACCAGCGTCGGTACCGTCGCAGTCTTCGGTC
1-mut (motif 1 mutated)	CCATTATTGGCCTAGACATAAGGTCAATAGGGGTGAGTCATTGGGTTTTTCCAGCCAATTTAATTAAAACGCCATGTACTTTCCCACCATTGACGTCAATGGGCTATTGAAACTAATGCAACGTGACCTTTAAACGGTACTTTCCCATAGCTGATTAATGGGAAAGTACCGTTCTCGAGCCAATACACGTCAATGGGAAGTGAAAGGGCAGCCAAAACGTAACACCGCCCCGGTTTTCCCCTGGAAATTCCATATTGGCACGCATTCTATTGGCTGAGCTGCGTTCTACGTGGGTATAAGAGGCGCGACCAGCGTCGGTACCGTCGCAGTCTTCGGTC
2-mut (motif 2 mutated)	CCATTATTGGCACGTACATAAGGTCAATAGGGGTGAGTCATTGGGTTTTTCCAGCCAATTTAATTAAAACGCCATGTACTTTCCCACCATTGCTAGCAATGGGCTATTGAAACTAATGCAACGTGACCTTTAAACGGTACTTTCCCATAGCTGATTAATGGGAAAGTACCGTTCTCGAGCCAATACACGTCAATGGGAAGTGAAAGGGCAGCCAAAACGTAACACCGCCCCGGTTTTCCCCTGGAAATTCCATATTGGCACGCATTCTATTGGCTGAGCTGCGTTCTACGTGGGTATAAGAGGCGCGACCAGCGTCGGTACCGTCGCAGTCTTCGGTC
3-mut (motif 3 mutated)	CCATTATTGGCACGTACATAAGGTCAATAGGGGTGAGTCATTGGGTTTTTCCAGCCAATTTAATTAAAACGCCATGTACTTTCCCACCATTGACGTCAATGGGCTATTGAAACTAATGCACTAGGACCTTTAAACGGTACTTTCCCATAGCTGATTAATGGGAAAGTACCGTTCTCGAGCCAATACACGTCAATGGGAAGTGAAAGGGCAGCCAAAACGTAACACCGCCCCGGTTTTCCCCTGGAAATTCCATATTGGCACGCATTCTATTGGCTGAGCTGCGTTCTACGTGGGTATAAGAGGCGCGACCAGCGTCGGTACCGTCGCAGTCTTCGGTC
4-mut (motif 4 mutated)	CCATTATTGGCACGTACATAAGGTCAATAGGGGTGAGTCATTGGGTTTTTCCAGCCAATTTAATTAAAACGCCATGTACTTTCCCACCATTGACGTCAATGGGCTATTGAAACTAATGCAACGTGACCTTTAAACGGTACTTTCCCATAGCTGATTAATGGGAAAGTACCGTTCTCGAGCCAATACCTAGCAATGGGAAGTGAAAGGGCAGCCAAAACGTAACACCGCCCCGGTTTTCCCCTGGAAATTCCATATTGGCACGCATTCTATTGGCTGAGCTGCGTTCTACGTGGGTATAAGAGGCGCGACCAGCGTCGGTACCGTCGCAGTCTTCGGTC
5-mut (motif 5 mutated)	CCATTATTGGCACGTACATAAGGTCAATAGGGGTGAGTCATTGGGTTTTTCCAGCCAATTTAATTAAAACGCCATGTACTTTCCCACCATTGACGTCAATGGGCTATTGAAACTAATGCAACGTGACCTTTAAACGGTACTTTCCCATAGCTGATTAATGGGAAAGTACCGTTCTCGAGCCAATACACGTCAATGGGAAGTGAAAGGGCAGCCAAAACGTAACACCGCCCCGGTTTTCCCCTGGAAATTCCATATTGGCACGCATTCTATTGGCTGAGCTGCGTTCTCTAGGGGTATAAGAGGCGCGACCAGCGTCGGTACCGTCGCAGTCTTCGGTC
all-mut (all motifs mutated)	CCATTATTGGCCTAGACATAAGGTCAATAGGGGTGAGTCATTGGGTTTTTCCAGCCAATTTAATTAAAACGCCATGTACTTTCCCACCATTGCTAGCAATGGGCTATTGAAACTAATGCACTAGGACCTTTAAACGGTACTTTCCCATAGCTGATTAATGGGAAAGTACCGTTCTCGAGCCAATACCTAGCAATGGGAAGTGAAAGGGCAGCCAAAACGTAACACCGCCCCGGTTTTCCCCTGGAAATTCCATATTGGCACGCATTCTATTGGCTGAGCTGCGTTCTCTAGGGGTATAAGAGGCGCGACCAGCGTCGGTACCGTCGCAGTCTTCGGTC
4-only (all motifs mutated except motif 4)	CCATTATTGGCCTAGACATAAGGTCAATAGGGGTGAGTCATTGGGTTTTTCCAGCCAATTTAATTAAAACGCCATGTACTTTCCCACCATTGCTAGCAATGGGCTATTGAAACTAATGCACTAGGACCTTTAAACGGTACTTTCCCATAGCTGATTAATGGGAAAGTACCGTTCTCGAGCCAATACACGTCAATGGGAAGTGAAAGGGCAGCCAAAACGTAACACCGCCCCGGTTTTCCCCTGGAAATTCCATATTGGCACGCATTCTATTGGCTGAGCTGCGTTCTCTAGGGGTATAAGAGGCGCGACCAGCGTCGGTACCGTCGCAGTCTTCGGTC
