# Supplementary material for: Repression of viral gene expression and replication by the unfolded protein response effector XBP1u
Source: eLife journal article supplement (doi:10.7554/elife.51804), 2020-02-17
Supplement: supp [file elife-51804-supp-v1.zip › elife_poa_e51804_Supplementary_file_2.xlsx]

## Sheet: Sheet1
Supplementary file 2
Name	Orientation	Sequence
Motif 1	fwd	TCCATTATTGGCACGTACATAAGGTCATCCATTATTGGCACGTACATAAGGTCATCCATTATTGGCACGTACATAAGGTCA-biotin
	rev	TGACCTTATGTACGTGCCAATAATGGATGACCTTATGTACGTGCCAATAATGGATGACCTTATGTACGTGCCAATAATGGA
Motif 2	fwd	TTCCCACCATTGACGTCAATGGGCTATTTCCCACCATTGACGTCAATGGGCTATTTCCCACCATTGACGTCAATGGGCTAT-biotin
	rev	ATAGCCCATTGACGTCAATGGTGGGAAATAGCCCATTGACGTCAATGGTGGGAAATAGCCCATTGACGTCAATGGTGGGAA
Motif 3	fwd	GAAACTAATGCAACGTGACCTTTAAACGAAACTAATGCAACGTGACCTTTAAACGAAACTAATGCAACGTGACCTTTAAAC-biotin
	rev	GTTTAAAGGTCACGTTGCATTAGTTTCGTTTAAAGGTCACGTTGCATTAGTTTCGTTTAAAGGTCACGTTGCATTAGTTTC
Motif 4	fwd	TCGAGCCAATACACGTCAATGGGAAGTTCGAGCCAATACACGTCAATGGGAAGTTCGAGCCAATACACGTCAATGGGAAGT-biotin
	rev	ACTTCCCATTGACGTGTATTGGCTCGAACTTCCCATTGACGTGTATTGGCTCGAACTTCCCATTGACGTGTATTGGCTCGA
Motif 5	fwd	GAGCTGCGTTCTACGTGGGTATAAGAGGAGCTGCGTTCTACGTGGGTATAAGAGGAGCTGCGTTCTACGTGGGTATAAGAG-biotin
	rev	CTCTTATACCCACGTAGAACGCAGCTCCTCTTATACCCACGTAGAACGCAGCTCCTCTTATACCCACGTAGAACGCAGCTC
ERdj4	fwd	CAACAGTTTTCCACGTGCGCGTAGGGCCAACAGTTTTCCACGTGCGCGTAGGGCCAACAGTTTTCCACGTGCGCGTAGGGC-biotin
	rev	GCCCTACGCGCACGTGGAAAACTGTTGGCCCTACGCGCACGTGGAAAACTGTTGGCCCTACGCGCACGTGGAAAACTGTTG
LT ori	fwd	TAATTAAGCCTCTTAAGCCTCAGAGGCCTCTCTCTTTTTTTTCCAGAGGCCTCGGAGGCTAGGAGCCCCAAGCCTCTGCC-biotin
	rev	GGCAGAGGCTTGGGGCTCCTAGCCTCCGAGGCCTCTGGAAAAAAAAGAGAGAGGCCTCTGAGGCTTAAGAGGCTTAATTA
