# Supplementary material for: Repression of viral gene expression and replication by the unfolded protein response effector XBP1u
Source: eLife journal article supplement (doi:10.7554/elife.51804), 2020-02-17
Supplement: supp [file elife-51804-supp-v1.zip › elife_poa_e51804_Supplementary_file_3.xlsx]

## Sheet: Sheet1
Supplementary file 3
Name	Orientation	Sequence
Ern1_1	fwd	GCTTGCATGCTGTTAGCAAG
	rev	CTTGCTAACAGCATGCAAGC
Ern1_2	fwd	GCATGCTGTTAGCAAGAGGA
	rev	TCCTCTTGCTAACAGCATGC
Ern1_3	fwd	GATGGCAGTCTGTACACACT
	rev	AGTGTGTACAGACTGCCATC
Xbp1_1	fwd	GCGTAGACGTTTCCTGGCTA
	rev	TAGCCAGGAAACGTCTACGC
Xbp1_2	fwd	GGCTATGGTGGTGGTGGCAG
	rev	CTGCCACCACCACCATAGCC
Xbp1_3	fwd	GGTGGCAGCGGCGCCGAGCG
	rev	CGCTCGGCGCCGCTGCCACC
Traf2_1	fwd	GGAGCCAGGGGAAGTCACA
	rev	TGTGACTTCCCCTGGCTCC
Traf2_2	fwd	GAGGTACTTGGCTTCTAAC
	rev	GTTAGAAGCCAAGTACCTC
Traf2_3	fwd	GGGCCTGGAAAGGCCTCCGC
	rev	GCGGAGGCCTTTCCAGGCCC
